# Supplementary material
Source: PubMed Central journal article supplement (PMC3904528)
Supplement: Supp_Fig1.pdf [file Supp_Fig1.pdf]

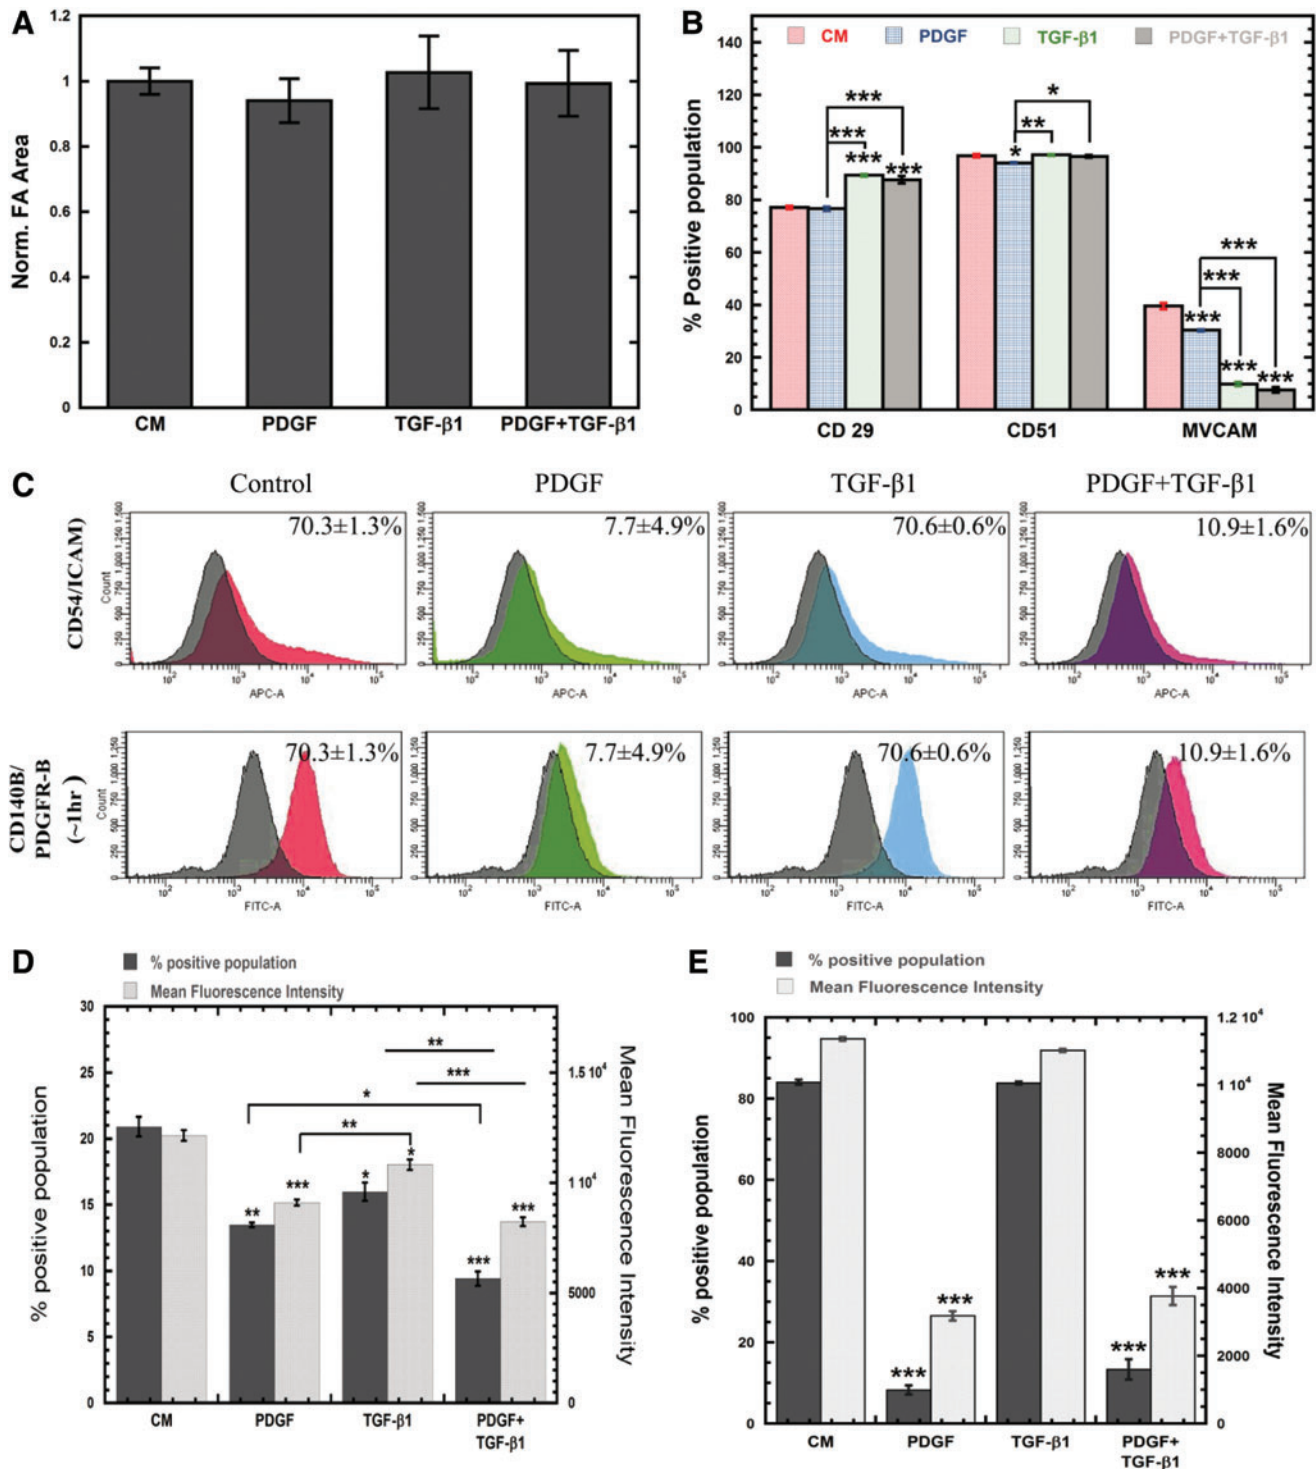

**SUPPLEMENTARY FIG. S1.** (A) Normalized focal adhesion areas were calculated by analysis of confocal images with custom MATLAB routine. (B) Percentage positive population (PPC) of mesenchymal stem cells (MSCs) calculated using FACS-DIVA for CD29, CD51, and VCAM1 after 24-h treatment with soluble factors. (C) Histograms of soluble factor MSCs from flow cytometry for CD54/ICAM (after 24 h) and PDGFR-B (after 1 h). Gated percent positive population of MSCs compared with the negative population (black histogram) is indicated as mean  $\pm$  standard error of the mean (SEM). (D) PPC and mean fluorescence intensity (MFI) calculated for CD54 after 24 h. (E) PPC and MFI calculated for CD140b/PDGFR-B after 1 h. Statistical significances are indicated as (\*) for  $p < 0.05$ , (\*\*) for  $p < 0.005$ , and (\*\*\*) for  $p < 0.0005$ .
