# Supplementary material
Source: PubMed Central journal article supplement (PMC3904528)
Supplement: Supp_Fig2.pdf [file Supp_Fig2.pdf]

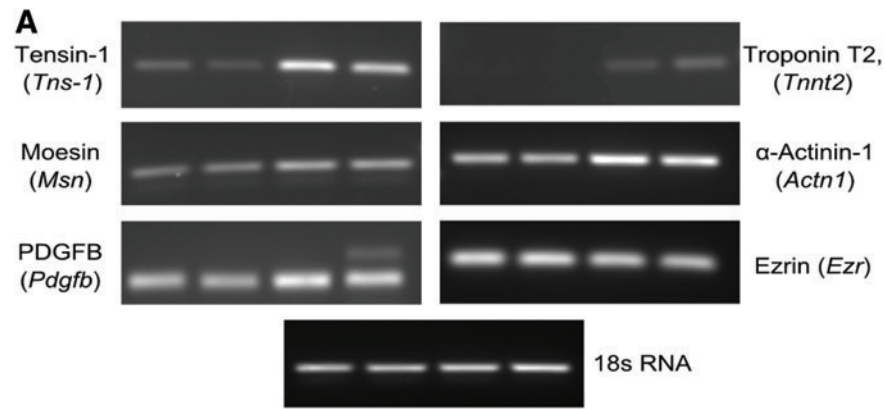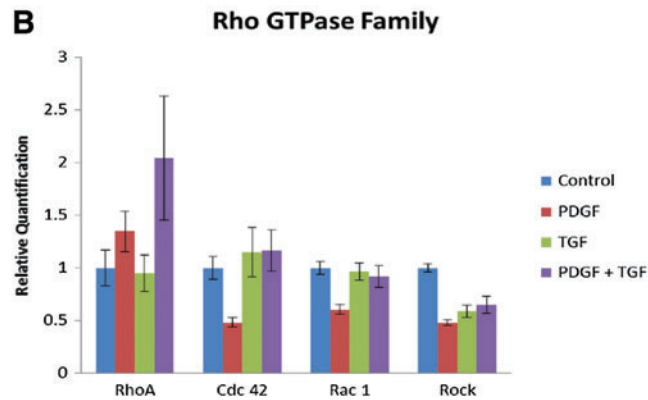

**SUPPLEMENTARY FIG. S2.** (A) Polymerase chain reaction (PCR)-amplified gene expression of actin-binding proteins was confirmed using 2% (w/v) agarose gel. Four lanes are corresponding to control media (CM), platelet-derived growth factor (PDGF), transforming growth factor- $\beta$ 1 (TGF- $\beta$ 1), and combination of PDGF and TGF- $\beta$ 1 (from left to right). *Tensin-1* (*Tns-1*), *troponin type 2* (*Tnnt2*), *moesin* (*Msn*), *alpha-actinin-1* (*Actn1*), and *platelet derived growth factor-beta* (*Pdgfb*) were all upregulated, whereas *ezrin* (*Ezr*) was downregulated. (B) Genetic expression of small Rho-GTPases (*RhoA*, *CDC42*, and *Rac1*) and Rho-associated protein kinase (*ROCK*) was determined using quantitative real-time PCR (SYBR-*green*). The expression was normalized to respective *GAPDH* control. Results are reported as average  $\pm$  SEM ( $n=3$ ).
