# Supplementary material
Source: PubMed Central journal article supplement (PMC3904528)
Supplement: Supp_Table1.pdf [file Supp_Table1.pdf]

SUPPLEMENTARY TABLE S1. TREATMENT-SPECIFIC SIGNIFICANTLY ENRICHED PATHWAYS

| <i>PDGF vs. control</i>                                                                                         | <i>P value</i> | <i>TGF-β1 vs. control</i>                                         | <i>P value</i> | <i>PDGF + TGF-β1 vs. control</i>                                           | <i>P value</i> |
|-----------------------------------------------------------------------------------------------------------------|----------------|-------------------------------------------------------------------|----------------|----------------------------------------------------------------------------|----------------|
| 10 most significant enriched pathways                                                                           |                |                                                                   |                |                                                                            |                |
| Cell adhesion and ECM remodeling                                                                                | 3.522e-6       | Cell adhesion and ECM remodeling                                  | 8.901e-10      | Cell adhesion and ECM remodeling                                           | 2.604e-10      |
| Immune response: IL17 signaling pathways                                                                        | 1.197e-5       | Cytoskeleton remodeling                                           | 2.084e-9       | Development: regulation of EMT                                             | 6.105e-9       |
| Immune response: IL16 signaling pathway                                                                         | 8.221e-5       | Chemokines and cell adhesion                                      | 3.395e-9       | Development: TGF-beta-dependent induction of EMT via SMADs                 | 1.003e-8       |
| Protein folding and Bradykinin/Kallidin maturation                                                              | 9.916e-5       | Development: regulation of EMT                                    | 6.388e-9       | Immune response: oncostatin M signaling via JAK-Stat in human cells        | 8.716e-7       |
| Immune response: Lectin induced complement pathway                                                              | 1.576e-4       | TGF, WNT dependent cytoskeletal remodeling                        | 1.683e-8       | Signal transduction: cAMP signaling                                        | 2.073e-6       |
| Immune response: oncostatin M signaling via MAPK                                                                | 1.672e-4       | Development: TGF-beta-dependent induction of EMT during via SMADs | 1.793e-8       | TGF, WNT dependent cytoskeletal remodeling                                 | 4.608e-6       |
| Immune response: oncostatin M signaling via MAPK in human cells                                                 | 2.300e-4       | Some pathways of EMT in cancer cells                              | 7.455e-8       | PGE2 pathways in cancer                                                    | 4.816e-6       |
| Immune response: classical complement pathway                                                                   | 2.308e-4       | PGE2 pathways in cancer                                           | 1.283e-7       | Development: Transcription regulation of granulocyte development           | 6.873e-6       |
| Mechanism of Proglitazone/Metformin and Rosiglitazone/Metformin cooperative action in Diabetes mellitus, Type 2 | 4.796e-4       | Development: Flt3 signaling                                       | 9.337e-7       | Development: WNT signaling pathway, Part 2                                 | 1.196e-5       |
|                                                                                                                 |                | Development: TGF-beta-dependent induction of EMT via MAPK         | 9.475e-7       | Role of Diethylhexyl Phthalate and Tributyltin in fat cell differentiation | 1.245e-5       |

PDGF, platelet derived growth factor; TGF-β1, transforming growth factor-β; ECM, extracellular matrix; EMT, epithelial-to-mesenchymal transition.
