# Supplementary material
Source: PubMed Central journal article supplement (PMC3904528)
Supplement: Supp_Table2.pdf [file Supp_Table2.pdf]

SUPPLEMENTARY TABLE S2. REGULATION OF CRITICAL GENES

| <i>Probe ID</i>                   | <i>Gene</i>     | <i>PDGF vs. control</i> | <i>TGF vs. control</i> | <i>PDGF+TGF vs. control</i> | <i>Probe ID</i>                               | <i>Gene</i>    | <i>PDGF vs. control</i> | <i>TGF vs. control</i> | <i>PDGF+TGF vs. control</i> |
|-----------------------------------|-----------------|-------------------------|------------------------|-----------------------------|-----------------------------------------------|----------------|-------------------------|------------------------|-----------------------------|
| Growth factors                    |                 |                         |                        |                             | Extracellular matrix and adhesion (continued) |                |                         |                        |                             |
| 1422912_at                        | <i>Bmp4</i>     | 1.22                    | -1.96                  | -3.17                       | 1420484_a_at                                  | <i>Vtn</i>     | 0.45                    | -2.67                  | -2.33                       |
| 1415931_at                        | <i>Igf2</i>     | 0.69                    | -2.80                  | -3.01                       | 1439713_at                                    | <i>Itga1</i>   | -1.61                   | -1.62                  | -2.24                       |
| 1415854_at                        | <i>Kitl</i>     | 0.60                    | -2.54                  | -3.00                       | 1435386_at                                    | <i>Vwf</i>     | -0.01                   | -1.29                  | -1.79                       |
| 1450759_at                        | <i>Bmp6</i>     | 0.02                    | -2.92                  | -2.94                       | 1420860_at                                    | <i>Itga9</i>   | -1.86                   | -1.92                  | -1.48                       |
| 1438953_at                        | <i>Fgf</i>      | -0.18                   | -2.04                  | -1.86                       | 1427009_at                                    | <i>Lama5</i>   | 1.12                    | 1.02                   | -1.45                       |
| 1422243_at                        | <i>Fgf7</i>     | -0.28                   | -1.93                  | -1.65                       | 1450567_a_at                                  | <i>Col2a1</i>  | -1.09                   | -1.09                  | -1.39                       |
| 1418471_at                        | <i>Pgf</i>      | 0.02                    | -1.17                  | -1.19                       | 1421997_s_at                                  | <i>Itga3</i>   | -0.73                   | 0.76                   | -1.27                       |
| 1419139_at                        | <i>Gdf5</i>     | -0.37                   | -1.51                  | -1.14                       | 1426285_at                                    | <i>Lama2</i>   | -0.38                   | -0.10                  | -1.10                       |
| 1417455_at                        | <i>Tgfb3</i>    | 0.04                    | 0.76                   | 0.73                        | 1447541_s_at                                  | <i>Itgae</i>   | 1.07                    | 0.09                   | 1.03                        |
| 1422053_at                        | <i>Inhba</i>    | -0.14                   | 0.64                   | 0.78                        | 1450501_at                                    | <i>Itga2</i>   | 0.35                    | 0.54                   | 1.06                        |
| 1419080_at                        | <i>Gdnf</i>     | 0.41                    | 1.23                   | 0.82                        | 1417812_a_at                                  | <i>Lamb3</i>   | -1.94                   | 0.50                   | 1.18                        |
| 1420653_at                        | <i>Tgfb1</i>    | 0.14                    | 1.21                   | 1.06                        | 1425815_a_at                                  | <i>Hmnr</i>    | -1.10                   | 0.53                   | 1.33                        |
| 1419417_at                        | <i>Vegfc</i>    | -0.26                   | 1.06                   | 1.29                        | 1423760_at                                    | <i>Cd44</i>    | 1.36                    | 0.15                   | 1.37                        |
| 1426858_at                        | <i>Inhbb</i>    | -0.52                   | 0.79                   | 1.31                        | 1420853_at                                    | <i>Sdc3</i>    | 0.38                    | 1.09                   | 1.37                        |
| 1449826_a_at                      | <i>Fgf2</i>     | -0.21                   | 1.23                   | 1.44                        | 1416623_at                                    | <i>Thbs3</i>   | 1.18                    | -0.23                  | 1.41                        |
| 1432032_a_at                      | <i>Artn</i>     | 0.10                    | 1.61                   | 1.50                        | 1423110_at                                    | <i>Col1a2</i>  | 0.22                    | 0.95                   | 1.42                        |
| 1420909_at                        | <i>Vegfa</i>    | -0.23                   | 1.40                   | 1.58                        | 1421006_at                                    | <i>Col4a6</i>  | 1.67                    | 1.17                   | 1.42                        |
| 1426238_at                        | <i>Bmp1</i>     | -0.10                   | 1.58                   | 1.70                        | 1426918_at                                    | <i>Itgb1</i>   | 1.28                    | -0.07                  | 1.48                        |
| 1419519_at                        | <i>Igf1</i>     | 0.60                    | 2.52                   | 1.99                        | 1427883_a_at                                  | <i>Col3a1</i>  | 1.37                    | -0.09                  | 1.67                        |
| 1421207_at                        | <i>Lif</i>      | -0.36                   | 1.90                   | 2.25                        | 1419703_at                                    | <i>Col5a3</i>  | 1.37                    | 1.28                   | 1.77                        |
| 1418711_at                        | <i>Pdgfa</i>    | -0.33                   | 2.28                   | 2.60                        | 1426642_at                                    | <i>Fn1</i>     | 1.25                    | -0.05                  | 1.77                        |
| 1423635_at                        | <i>Bmp2</i>     | -0.75                   | 3.35                   | 4.10                        | 1418599_at                                    | <i>Col11a1</i> | 0.33                    | 1.42                   | 1.89                        |
| Cytokines and chemokines          |                 |                         |                        |                             | 1427512_a_at                                  | <i>Lama3</i>   | 0.61                    | 1.05                   | 2.02                        |
| 1419728_at                        | <i>Cxcl5</i>    | -0.09                   | -6.69                  | -6.60                       | 1416740_at                                    | <i>Col5a1</i>  | 2.22                    | 0.16                   | 2.07                        |
| 1423017_a_at                      | <i>Il1rn</i>    | 0.16                    | -4.47                  | -4.63                       | 1419088_at                                    | <i>Timp3</i>   | 2.09                    | 0.13                   | 2.08                        |
| 1422651_at                        | <i>Adipoq</i>   | 0.23                    | -4.23                  | -4.45                       | 1420450_at                                    | <i>Mmp10</i>   | 1.62                    | -0.49                  | 2.11                        |
| 1419209_at                        | <i>Cxcl1</i>    | -0.32                   | -3.92                  | -3.61                       | 1416740_at                                    | <i>Col5a1</i>  | 0.27                    | 2.31                   | 2.14                        |
| 1422912_at                        | <i>Bmp4</i>     | 1.22                    | -1.96                  | -3.17                       | 1424807_at                                    | <i>Lama4</i>   | 1.32                    | 1.20                   | 2.25                        |
| 1417574_at                        | <i>Cxcl12</i>   | 0.45                    | -2.65                  | -3.11                       | 1421511_at                                    | <i>Itgb3</i>   | 1.11                    | 1.83                   | 2.42                        |
| 1420380_at                        | <i>Ccl2</i>     | 0.12                    | -2.95                  | -3.07                       | 1442140_at                                    | <i>Tnn</i>     | 1.13                    | 2.76                   | 3.48                        |
| 1450759_at                        | <i>Bmp6</i>     | 0.02                    | -2.92                  | -2.94                       | 1416342_at                                    | <i>Tnc</i>     | 0.34                    | 5.43                   | 7.18                        |
| 1418126_at                        | <i>Ccl5</i>     | 0.32                    | -2.51                  | -2.83                       | Transcription factors and signaling molecules |                |                         |                        |                             |
| 1419083_at                        | <i>Tnfrsf11</i> | 0.08                    | -2.21                  | -2.30                       | 1423259_at                                    | <i>Id4</i>     | -1.17                   | -3.40                  | -3.25                       |
| 1421228_at                        | <i>Ccl7</i>     | 0.26                    | -1.48                  | -1.75                       | 1416630_at                                    | <i>Id3</i>     | -0.11                   | -2.16                  | -2.45                       |
| 1418219_at                        | <i>Il15</i>     | 0.73                    | -0.96                  | -1.69                       | 1422537_a_at                                  | <i>Id2</i>     | -1.27                   | -1.43                  | -2.36                       |
| 1415803_at                        | <i>Cx3cl1</i>   | 0.30                    | -1.10                  | -1.40                       | 1425895_a_at                                  | <i>Id1</i>     | -0.75                   | -2.55                  | -2.14                       |
| 1422080_at                        | <i>Il7</i>      | 0.25                    | -1.22                  | -1.15                       | 1450782_at                                    | <i>Wnt4</i>    | -0.30                   | -1.37                  | -2.06                       |
| 1450297_at                        | <i>Il6</i>      | 0.10                    | -0.97                  | -1.07                       | 1422771_at                                    | <i>Smad6</i>   | -0.59                   | -1.31                  | -1.56                       |
| 1449982_at                        | <i>Il11</i>     | 0.96                    | -1.11                  | 2.08                        | 1422019_at                                    | <i>Tgfb2</i>   | 0.95                    | 1.45                   | 1.20                        |
| Extracellular matrix and adhesion |                 |                         |                        |                             | 1417621_at                                    | <i>Nfatc1</i>  | 0.90                    | 2.33                   | 2.60                        |
| 1429072_at                        | <i>Col6a4</i>   | -0.57                   | -4.37                  | -4.42                       | 1425377_at                                    | <i>Wnt1</i>    | 0.25                    | 2.05                   | 3.05                        |
| 1415989_at                        | <i>Vcam1</i>    | -3.10                   | 0.50                   | -3.32                       | 1421341_at                                    | <i>Axin2</i>   | -0.13                   | 4.00                   | 4.21                        |
| 1450798_at                        | <i>Tnxb</i>     | -0.27                   | -2.94                  | -3.28                       | 1425901_at                                    | <i>Nfatc2</i>  | -0.83                   | 3.76                   | 4.32                        |
| 1449563_at                        | <i>Cntn1</i>    | -2.46                   | 0.27                   | -2.56                       | 1420891_at                                    | <i>Wnt7b</i>   | -0.31                   | 4.60                   | 5.15                        |
