# Supplementary material
Source: PubMed Central journal article supplement (PMC3904528)
Supplement: Supp_Table3.pdf [file Supp_Table3.pdf]

SUPPLEMENTARY TABLE S3. LIST OF PRIMERS FOR POLYMERASE CHAIN REACTION/QUANTITATIVE  
REAL-TIME POLYMERASE CHAIN REACTION

| <i>Gene name</i>                      |                 | <i>Sequence</i>               | <i>Amplicon size (bp)</i> |
|---------------------------------------|-----------------|-------------------------------|---------------------------|
| Ezrin ( <i>Ezr</i> )                  | Forward (5'-3') | CAA TCA ACG TCC GGG TGA C     | 104                       |
|                                       | Reverse (5'-3') | GCC AAT CGT CTT TAC CAC CTG A | 104                       |
| Moesin ( <i>Msn</i> )                 | Forward (5'-3') | TCT TAT GCC GTC CAG TCT AAG T | 121                       |
|                                       | Reverse (5'-3') | GGT CCT TGT TGA GTT TGT GCT   | 121                       |
| $\alpha$ -actinin-1 ( <i>Actn1</i> )  | Forward (5'-3') | AGA AAT CCA GCT CCT AGC ACG   | 147                       |
|                                       | Reverse (5'-3') | CTG TGA ACG TCT TCC TCT GCT   | 147                       |
| Tensin-1 ( <i>Tns1</i> )              | Forward (5'-3') | TCA CAG CCT ACC AGT CTC TCT   | 166                       |
|                                       | Reverse (5'-3') | ACA TCT GAG CCA CTT CAC GG    | 166                       |
| PDGF-B ( <i>Pdgfb</i> )               | Forward (5'-3') | TCC GTA GAT GAA GAT GGG GCT   | 163                       |
|                                       | Reverse (5'-3') | TCT GGA ACA CCT CTG TGC G     | 163                       |
| Troponin T2, cardiac ( <i>Tnnt2</i> ) | Forward (5'-3') | CCC GAT GGA GAG AGA GTG GA    | 155                       |
|                                       | Reverse (5'-3') | CGA CGC TTT TCG ATC CTG TC    | 155                       |
| 18s rRNA                              | Forward (5'-3') | CTT AGA GGG ACA AGT GGC G     | 107                       |
|                                       | Reverse (5'-3') | ACG CTG AGC CAG TCA GTG TA    | 107                       |
| <i>Cdc42</i>                          | Forward (5'-3') | CCCATCGGAATATGTACCAACTG       | 78                        |
|                                       | Reverse (5'-3') | CCAAGAGTGTATGGCTCTCCAC        | 78                        |
| <i>RhoA</i>                           | Forward (5'-3') | AGCTTGTGGTAAGACATGCTTG        | 138                       |
|                                       | Reverse (5'-3') | GTGTCCCATAAAGCCAACCTCTAC      | 138                       |
| <i>Rac1</i>                           | Forward (5'-3') | GAGACGGAGCTGTTGGTAAAA         | 138                       |
|                                       | Reverse (5'-3') | ATAGGCCAGATTCACCTGGTT         | 138                       |
| <i>GAPDH</i>                          | Forward (5'-3') | AGGTCGGTGTGAACGGATTT          | 123                       |
|                                       | Reverse (5'-3') | TGTAGACCATGTAGTTGAGGTCA       | 123                       |
