# Supplementary material
Source: PubMed Central journal article supplement (PMC3904528)
Supplement: Supp_Table4.pdf [file Supp_Table4.pdf]

SUPPLEMENTARY TABLE S4. LIST OF STATISTICAL ANALYSIS RESULTS USING ONE-WAY ANALYSIS OF VARIANCE

| <i>Tukey's all pairs comparison</i> |                     |                        |            |          |                       |
|-------------------------------------|---------------------|------------------------|------------|----------|-----------------------|
|                                     | <i>Comparison</i>   | <i>Mean difference</i> | <i> q </i> | <i>P</i> | <i>95% CL</i>         |
| Cell shape factor                   | PDGF vs. PDGF + TGF | 0.205093               | 19.6176    | <0.0001  | 0.16686–0.24333       |
|                                     | CM vs. TGF          | 0.124934               | 11.9502    | <0.0001  | 0.086696–0.16317      |
|                                     | PDGF vs. CM         | 0.0203165              | 1.9433     | 0.5168   | –0.017921 to 0.058554 |
|                                     | CM vs. PDGF + TGF   | 0.184776               | 17.6743    | <0.0001  | 0.14654–0.22301       |
|                                     | PDGF vs. TGF        | 0.104617               | 10.0069    | <0.0001  | 0.066379–0.14285      |
| Nuclear shape factor                | TGF vs. PDGF + TGF  | 0.0801593              | 7.6674     | <0.0001  | 0.041922–0.1184       |
|                                     | CM vs. PDGF + TGF   | 0.126936               | 8.9301     | <0.0001  | 0.075098–0.17877      |
|                                     | CM vs. TGF          | 0.0500191              | 3.5189     | 0.0631   | –0.0018186 to 0.10186 |
|                                     | CM vs. PDGF         | 0.0340767              | 2.3973     | 0.3274   | –0.017761 to 0.085914 |
|                                     | PDGF vs. PDGF + TGF | 0.0928589              | 6.5328     | <0.0001  | 0.041021–0.1447       |
| Stress fiber density                | PDGF vs. TGF        | 0.0159424              | 1.1216     | 0.8576   | –0.035895 to 0.06778  |
|                                     | TGF vs. PDGF + TGF  | 0.0769165              | 5.4112     | 0.0009   | 0.025079–0.12875      |
|                                     | PDGF + TGF vs. PDGF | 0.433519               | 17.1451    | <0.0001  | 0.33385–0.53319       |
|                                     | PDGF + TGF vs. CM   | 0.301586               | 11.9273    | <0.0001  | 0.20191–0.40126       |
|                                     | PDGF + TGF vs. TGF  | 0.085724               | 3.3903     | 0.1085   | –0.013948 to 0.1854   |
| Adhesion–plastic                    | TGF vs. PDGF        | 0.347795               | 13.7549    | <0.0001  | 0.24812–0.44747       |
|                                     | TGF vs. CM          | 0.215863               | 8.5371     | <0.0001  | 0.11619–0.31553       |
|                                     | CM vs. PDGF         | 0.131933               | 5.2178     | 0.0069   | 0.032261–0.2316       |
|                                     | PDGF + TGF vs. PDGF | 0.433519               | 17.1451    | <0.0001  | 0.33385–0.53319       |
|                                     | PDGF + TGF vs. CM   | 0.301586               | 11.9273    | <0.0001  | 0.20191–0.40126       |
| Adhesion–fibronectin                | PDGF + TGF vs. TGF  | 0.085724               | 3.3903     | 0.1085   | –0.013948–0.1854      |
|                                     | TGF vs. PDGF        | 0.347795               | 13.7549    | <0.0001  | 0.24812–0.44747       |
|                                     | TGF vs. CM          | 0.215863               | 8.5371     | <0.0001  | 0.11619–0.31553       |
|                                     | CM vs. PDGF         | 0.131933               | 5.2178     | 0.0069   | 0.032261–0.2316       |
|                                     | PDGF + TGF vs. PDGF | 0.285019               | 7.7337     | 0.0001   | 0.13974–0.43029       |
| Adhesion–collagen                   | PDGF + TGF vs. CM   | 0.212321               | 5.7611     | 0.0028   | 0.067047–0.3576       |
|                                     | PDGF + TGF vs. TGF  | 0.094187               | 2.5557     | 0.2979   | –0.051087 to 0.23946  |
|                                     | TGF vs. PDGF        | 0.190832               | 5.178      | 0.0073   | 0.045558–0.33611      |
|                                     | TGF vs. CM          | 0.118134               | 3.2054     | 0.1382   | –0.02714 to 0.26341   |
|                                     | CM vs. PDGF         | 0.072698               | 1.9726     | 0.5162   | –0.072576 to 0.21797  |
|                                     | TGF vs. PDGF        | 0.27899                | 8.5451     | <0.0001  | 0.15029–0.40769       |
|                                     | TGF vs. CM          | 0.18795                | 5.7567     | 0.0029   | 0.059252–0.31665      |
|                                     | TGF vs. PDGF + TGF  | 0.056697               | 1.7366     | 0.6167   | –0.072002 to 0.1854   |
|                                     | PDGF + TGF vs. PDGF | 0.222293               | 6.8086     | 0.0005   | 0.093595–0.35099      |
|                                     | PDGF + TGF vs. CM   | 0.131253               | 4.0201     | 0.0446   | 0.0025549–0.25995     |
|                                     | CM vs. PDGF         | 0.09104                | 2.7884     | 0.2301   | –0.037658 to 0.21974  |

(continued)

SUPPLEMENTARY TABLE 4. (CONTINUED)

|              |                   | MFI                          |         |         |                   | %positive population         |          |         |         |                    |
|--------------|-------------------|------------------------------|---------|---------|-------------------|------------------------------|----------|---------|---------|--------------------|
|              |                   | Tukey's all pairs comparison |         |         |                   | Tukey's all pairs comparison |          |         |         |                    |
| Comparison   | Mean difference   | q                            | P       | 95% CL  | Comparison        | Mean difference              | q        | P       | 95% CL  |                    |
| CD140b       | CM vs. PDGF+TGF   | 19147.3                      | 14.7471 | <0.0001 | 13,267-25,027     | TGF vs. PDGF                 | 10.9333  | 6.6436  | 0.0067  | 3.4803-18.386      |
|              | CM vs. PDGF       | 16,477                       | 12.6904 | <0.0001 | 10,597-22,357     | TGF vs. PDGF+TGF             | 5.76667  | 3.5041  | 0.1386  | -1.6864 to 13.22   |
|              | CM vs. TGF        | 9,550                        | 7.3553  | 0.0036  | 3669.9-15430      | TGF vs. CM                   | 0.299998 | 0.1823  | 0.9992  | -7.1531 to 7.7531  |
|              | TGF vs. PDGF+TGF  | 9597.33                      | 7.3918  | 0.0035  | 3717.2-15477      | CM vs. PDGF                  | 10.6333  | 6.4613  | 0.0079  | 3.1803-18.086      |
|              | TGF vs. PDGF      | 6,927                        | 5.3351  | 0.0227  | 1046.9-12807      | CM vs. PDGF+TGF              | 5.46667  | 3.3218  | 0.1656  | -1.9864 to 12.92   |
|              | PDGF vs. PDGF+TGF | 2670.33                      | 2.0567  | 0.5039  | -3209.8 to 8550.4 | PDGF+TGF vs. PDGF            | 5.16667  | 3.1395  | 0.1974  | -2.2864 to 12.62   |
|              | TGF vs. PDGF      | 15,015                       | 16.2255 | <0.0001 | 10,824-19206      | TGF vs. PDGF                 | 3.1      | 7.4639  | 0.0033  | 1.219-4.981        |
|              | TGF vs. CM        | 10482.3                      | 11.3274 | 0.0002  | 6291.4-14,673     | TGF vs. PDGF+TGF             | 0.566671 | 1.3644  | 0.7724  | -1.3143 to 2.4476  |
|              | TGF vs. PDGF+TGF  | 2026.67                      | 2.1901  | 0.4553  | -2164.3 to 6217.6 | TGF vs. CM                   | 0.333336 | 0.8026  | 0.939   | -1.5476 to 2.2143  |
|              | PDGF+TGF vs. PDGF | 12,988.3                     | 14.0354 | <0.0001 | 8797.4-17179      | CM vs. PDGF                  | 2.76667  | 6.6613  | 0.0066  | 0.88571-4.6476     |
| CD51         | PDGF+TGF vs. CM   | 8455.67                      | 9.1373  | 0.0009  | 4264.7-12647      | CM vs. PDGF+TGF              | 0.233335 | 0.5618  | 0.9773  | -1.6476 to 2.1143  |
|              | CM vs. PDGF       | 4532.67                      | 4.8981  | 0.0347  | 341.72-8723.6     | PDGF+TGF vs. PDGF            | 2.53333  | 6.0995  | 0.011   | 0.65237-4.4143     |
|              | TGF vs. PDGF      | 13,783                       | 8.0575  | 0.002   | 6036.1-21,530     | TGF vs. PDGF                 | 12.7667  | 14.7389 | <0.0001 | 8.8439-16.689      |
|              | TGF vs. CM        | 13,579                       | 7.9382  | 0.0022  | 5832.1-21,326     | TGF vs. CM                   | 12.2     | 14.0847 | <0.0001 | 8.2772-16.123      |
|              | TGF vs. PDGF+TGF  | 4,895                        | 2.8616  | 0.2561  | -2851.9 to 12,642 | TGF vs. PDGF+TGF             | 1.7      | 1.9626  | 0.5395  | -2.2228 to 5.6228  |
|              | PDGF+TGF vs. PDGF | 8888                         | 5.1959  | 0.0259  | 1141.1-16635      | PDGF+TGF vs. PDGF            | 11.0667  | 12.7763 | <0.0001 | 7.1439-14.989      |
|              | PDGF+TGF vs. CM   | 8,684                        | 5.0766  | 0.0291  | 937.1-16431       | PDGF+TGF vs. CM              | 10.5     | 12.1221 | 0.0001  | 6.5772-14.423      |
|              | CM vs. PDGF       | 204                          | 0.1193  | 0.9998  | -7542.9 to 7950.9 | CM vs. PDGF                  | 0.566668 | 0.6542  | 0.9652  | -3.3561 to 4.4895  |
|              | CM vs. PDGF+TGF   | 4,288                        | 27.2943 | <0.0001 | 3576.5-4999.5     | CM vs. PDGF+TGF              | 31.9333  | 37.3965 | <0.0001 | 28.066-35.801      |
|              | CM vs. TGF        | 4018.33                      | 25.5778 | <0.0001 | 3306.8-4729.8     | CM vs. TGF                   | 29.7     | 34.7811 | <0.0001 | 25.833-33.567      |
| CD106        | CM vs. PDGF       | 1404.33                      | 8.939   | 0.001   | 692.85-2115.8     | CM vs. PDGF                  | 9.16667  | 10.7349 | 0.0003  | 5.2995-13.034      |
|              | PDGF vs. PDGF+TGF | 2883.67                      | 18.3553 | <0.0001 | 2172.2-3595.2     | PDGF vs. PDGF+TGF            | 22.7667  | 26.6616 | <0.0001 | 18.899-26.634      |
|              | PDGF vs. TGF      | 2,614                        | 16.6388 | <0.0001 | 1902.5-3325.5     | PDGF vs. TGF                 | 20.5333  | 24.0462 | <0.0001 | 16.666-24.401      |
|              | TGF vs. PDGF+TGF  | 269.667                      | 1.7165  | 0.6359  | -441.82 to 981.15 | TGF vs. PDGF+TGF             | 2.23333  | 2.6154  | 0.3196  | -1.6339 to 6.1005  |
|              | CM vs. PDGF+TGF   | 3,915                        | 20.0467 | <0.0001 | 2958.9-4871.1     | CM vs. PDGF+TGF              | 11.5     | 18.4801 | <0.0001 | 8.4535-14.546      |
|              | CM vs. PDGF       | 3,048                        | 15.6072 | 0.0001  | 2091.9-4004.1     | CM vs. PDGF                  | 7.43333  | 11.9451 | 0.0006  | 4.3868-10.48       |
|              | CM vs. TGF        | 1325.67                      | 6.7881  | 0.0119  | 369.59-2281.7     | CM vs. TGF                   | 4.93333  | 7.9277  | 0.0055  | 1.8868-7.9798      |
|              | TGF vs. PDGF+TGF  | 2589.33                      | 13.2587 | 0.0003  | 1633.3-3545.4     | TGF vs. PDGF+TGF             | 6.56667  | 10.5524 | 0.0012  | 3.5202-9.6132      |
|              | PDGF vs. TGF      | 1722.33                      | 8.8192  | 0.0032  | 766.25-2678.4     | PDGF vs. TGF                 | 2.5      | 4.0174  | 0.1041  | -0.54648 to 5.5465 |
|              | PDGF vs. PDGF+TGF | 867                          | 4.4395  | 0.0729  | -89.08 to 1823.1  | PDGF vs. PDGF+TGF            | 4.06667  | 6.535   | 0.0142  | 1.0202-7.1132      |
| CD140b (~1h) | CM vs. PDGF       | 8182.33                      | 59.6382 | <0.0001 | 7510.7-8854       | CM vs. PDGF                  | 75.7667  | 64.7166 | <0.0001 | 70.035-81.498      |
|              | CM vs. PDGF+TGF   | 7,593                        | 55.3428 | <0.0001 | 6921.3-8264.7     | CM vs. PDGF+TGF              | 70.6667  | 60.3604 | <0.0001 | 64.935-76.398      |
|              | CM vs. TGF        | 343.333                      | 2.5024  | 0.3701  | -328.34 to 1015   | CM vs. TGF                   | 0.199999 | 0.1708  | 0.9993  | -5.5315 to 5.9315  |
|              | TGF vs. PDGF      | 78.39                        | 57.1358 | <0.0001 | 7167.3-8510.7     | TGF vs. PDGF                 | 75.5667  | 64.5457 | <0.0001 | 69.835-81.298      |
|              | TGF vs. PDGF+TGF  | 7249.67                      | 52.8403 | <0.0001 | 6578-7921.3       | TGF vs. PDGF+TGF             | 70.4667  | 60.1895 | <0.0001 | 64.735-76.198      |
|              | PDGF+TGF vs. PDGF | 589.333                      | 4.2954  | 0.0823  | -82.34 to 1261    | TGF vs. PDGF+TGF             | 5.1      | 4.3562  | 0.0782  | -0.6315 to 10.832  |

CL-, confidence level.
